# Supplementary material for: Extracellular vesicles from canine mammary tumor cells promote macrophage M2 polarization and enhance tumor progression
Source: Vet Res Commun. 2026 Mar 30;50(3):243. doi: 10.1007/s11259-026-11179-3 (PMC13035530; doi:10.1007/s11259-026-11179-3)
Supplement: Supplementary file 2 — Supplementary Material 2 (XLSX 11.6 KB) [file 11259_2026_11179_MOESM2_ESM.xlsx]

## Sheet: Sheet1
Table S1. Primer sequences used for qRT-PCR.
Primer	Sequence [5'-3']
GAPDH	Forward	AACATCATCCCTGCTTCCAC
	Reverse	GACCACCTGGTCCTCAGTGT
CD206	Forward	GGAAATATGTAAACAGGAATGATGC
	Reverse	TCCATCCAAATAAACTTTTTATCCA
VEGF-A	Forward	GCTGCTGTAATGATGAGGGC
	Reverse	CCCTTCCCCTTTCCTCGAAT
IL-10	Forward	AGTTACCTGGGTTGCCAAGC
	Reverse	TGATGTCTGGGTCGTGGTTC
COX2	Forward	GCCTTACCCAGTTTGTGGAA
	Reverse	AGCCTAAAGCGTTTGCGATA
iNOS	Forward	GAGATCAATGTCGCTGTACTCC
	Reverse	TGATGGTCACATTTTGCTTCTG
IL-6	Forward	GGCTACTGCTTTCCCTACCC
	Reverse	TTTTCTGCCAGTGCCTCTTT
E-cadherin	Forward	CTGATGCTGAGGATAACTGAGG
	Reverse	TACAAACTGTGACCTAAGGATCG
Vimentin	Forward	CAGGATTGCTCTGCCTCTTC
	Reverse	GGCAAGCTTCACTCAAGGTC
Fibronectin	Forward	GAACCACGCCGAACTACGAT
	Reverse	ATGCGATACATGACCCCTTCA
α-SMA	Forward	ACACGGCATCATCACCAACTG
	Reverse	CAGGGTGGGATGCTCTTCGG
